# Supplementary material
Source: PubMed Central journal article supplement (PMC5824284)
Supplement: jamaoncol-e171062-s001.pdf [file jamaoncol-e171062-s001.pdf]

1 **The effectiveness of telephone reminders and SMS messages on**  
2 **compliance with colorectal cancer screening: an open-label,**  
3 **randomized controlled trial**

4  
5 **INVESTIGATORS**

6 Martin CS Wong, Institute of Digestive Disease, CUHK

7 Jessica YL Ching, Institute of Digestive Disease, CUHK

8 Thomas YT Lam, Institute of Digestive Disease, CUHK

9  
10 **BACKGROUND**

11  
12 Colorectal cancer (CRC) is one of the major global health challenges. CRC is currently  
13 the third most common cancer in men and the second common in women worldwide,  
14 accounting for approximately 10% of all cancers. It leads to 8% of all cancer mortality in  
15 the world and it is the fourth most common cause of cancer deaths [1]. There were 4,563  
16 new cases and 3,893 new deaths in Hong Kong in 2012, while 47.4% of the new cases  
17 were diagnosed at stage III or above [2]. In the past decades the Asia Pacific countries  
18 like China, South Korea, Japan, and Singapore have witnessed a two to three-fold rise in  
19 incidence [3], gradually catching up the figures in Western countries. The direct medical  
20 cost for the care of colorectal neoplasia was estimated US\$45,115 for stage IV CRC in  
21 the initial year of care, bringing a substantial, global public health burden to the  
22 healthcare systems [4].

23  
24 Randomized controlled studies have shown that CRC screening using Faecal Occult  
25 Blood Testing (FOBT) is effective in reducing cancer mortality by 15-33% [5-7]. FOBT  
26 as a quick office-based procedure has the advantages of being non-invasive, inexpensive,  
27 acceptable, feasible, patient-friendly and devoid of needs for bowel preparation. A 25%  
28 relative risk reduction in CRC mortality was found for those attending at least one round  
29 of FOBT screening, according to a systematic review conducted in 2007 [8]. Guidelines  
30 from the US Preventive Services Task Force, the European Nations, the Asia Pacific

31 Consensus statements and other authorities recommended FOBT as one of the first-line  
32 screening modalities, especially in resource-limited regions [9-12]. Since yearly testing  
33 is recommended to maintain programmatic effectiveness [10, 13, 14], longitudinal  
34 adherence is a critical component of FOBT-based screening programs. Our previous  
35 study conducted in Hong Kong showed that the rate of compliance with CRC screening  
36 was declining since the first year of enrolment [15].

37  
38 Nevertheless, it remains unknown whether interventions based on reminder systems  
39 could effectively enhance longitudinal compliance with FOBT, especially among those  
40 who have already enrolled in a CRC screening programme. Current evidence does not  
41 adequately compare whether interactive or one-way reminder messages are superior to  
42 usual care (i.e. no reminders).

43

#### 44 **STUDY AIMS**

45 To compare the effectiveness of (1). interactive telephone reminders and (2). non-  
46 interactive SMS messages on enhancing compliance with CRC screening by FOBT,  
47 when compared with usual care (i.e. no intervention).

48

#### 49 **STUDY POPULATION**

50

##### 51 **Inclusion Criteria**

52 Subjects who joined the bowel cancer screening programme in the CUHK JC Bowel  
53 Cancer Education Centre who are expected to follow-up and return to the centre for  
54 annual Fecal Occult Blood Test.

55

##### 56 **Exclusion Criteria**

57 (1) had medical conditions rendering them unable to understand telephone or SMS  
58 messages; or (2) had no mobile phone were excluded.

59

60

61

62           **METHODOLOGY**

63

64   1. All subjects will be recruited from the existing cohort of screening participants who  
65       joined the bowel cancer screening programme in the CUHK JC Bowel Cancer  
66       Education Centre in 2015 with FOBT negative in the first round of screening, and  
67       who are expected to follow-up and return to the centre in 2016 for their second round  
68       of FOBT screening.

69

70   2. Each study subjects will be offered one of the following: (1). a personal, interactive  
71       telephone reminder by a center colleague to remind return to the center for taking  
72       fecal tubes for screening; (2). a one-way, SMS message sent from the center to the  
73       screening participant's mobile phone; or (3). usual care, where no additional  
74       intervention will be offered. A simple random sampling process will be administered  
75       using computer-generated numbers so that each participant will have a probability of  
76       1/3 for assignment into each group. All potential participants identified who are  
77       eligible for the study will be randomized by a computer randomizer, which will give a  
78       number indicating the group assigned. Each subject will have equal opportunity to be  
79       allocated to any one of the three arms (i.e. allocation ratio of 1:1:1)

80

81   3. The outcome of interest included the proportion of subjects who return to the centre  
82       and retrieve fecal tubes for screening 30 days within the scheduled time for the  
83       second year of the screening test.

84

85   4. Data will be analyzed using SPSS version 20.0 for Windows and were expressed as  
86       proportions. The baseline characteristics of the three groups are compared by chi-  
87       square tests of heterogeneity and Student's t-tests for categorical and continuous  
88       variables, respectively. The associations between the study groups and the outcome  
89       variables are examined by backward stepwise, binary logistic regression analyses.  
90       The covariates included age, gender, educational level, monthly household income,  
91       job status, marital status, body mass index, waist circumference, family history of  
92       CRC in a first-degree relative, smoking, alcohol drinking, comorbidities and use of  
93       medications. The control group and the SMS group are used as the reference group in

94 separate analyses. Subgroup analysis according to marital status, household income  
95 and educational level was performed, since previous studies identified these variables  
96 as potential effect modifiers. A p value of  $\leq 0.05$  will be interpreted as statistically  
97 significant, and a p value between 0.5 and 0.1 is considered indicative of a trend  
98 towards significance.

99

100

#### 101 **END POINTS**

102

- 103 1. Rate of completion of FOBT in the year of receiving the interventions/control
- 104 2. Rate of return to the centre for taking FOBT tubes in the year of receiving the  
105 interventions/control

106

#### 107 **SAMPLE SIZE**

108

109 The total sample size is 600 with 200 subjects in each of the three groups. A power  
110 calculation indicates that a sample of 600 participants would provide 80% power (at the  
111 5% level) of detecting an increase of 11% in the interactive phone call and automated  
112 SMS message groups versus no increase in the control group (there are no studies of  
113 similar nature comparing the effectiveness among interactive vs. automated telephone  
114 calls vs. control).

115

#### 116 **TIME LINE**

117

|                        |                                                                                                        |
|------------------------|--------------------------------------------------------------------------------------------------------|
| 118 Feb 15, 2016       | Proposed study start date                                                                              |
| 119 September 30, 2016 | Proposed study end date or date of last follow-up of all recruited<br>120 subjects, whichever is later |
| 121 Dec 31, 2016       | Tentative final report date to Cluster REC                                                             |

122

123

124

125

126 **DECLARATION**

127 The study will be conducted in compliance with ICH-GCP guidelines. This study will  
128 also [comply with the Declaration of Helsinki](#): Ethical Principles for Medical Research  
129 Involving Human Subjects.

130

131 **REFERENCE**

132 1). Ferlay J, Shin HR, Bray F, et al. Estimates of worldwide burden of cancer in 2008:  
133 GLOBOCAN 2008. *Int J Cancer* 2010;127:2893-2917.

134 2). Hong Kong Cancer Registry, Hospital Authority. Top ten cancers in 2012.  
135 [http://www3.ha.org.hk/cancereg/rank\\_2012.pdf](http://www3.ha.org.hk/cancereg/rank_2012.pdf). Updated 2015. Accessed 12/30/2015,  
136 2015.

137 3). Sung JJY, Lau JYW, Goh KL, et al, for the on Asia Pacific Working Group on  
138 Colorectal Cancer. Increasing incidence of colorectal cancer in Asia: implications for  
139 screening. *Lancet Oncol* 2005;6:871–6.

140 4). Wong CK, Lam CL, Poon JT, et al. Direct medical costs of care for Chinese patients  
141 with colorectal neoplasia: a health care service provider perspective. *J Eval Clin Pract*.  
142 2011; doi: 10.1111/j.1365-2753.2011.01776.x.

143 5). Hardcastle JD, Chamberlain JO, Robinson MH, et al. Randomised controlled trial of  
144 faecal-occult-blood screening for colorectal cancer. *Lancet* 1996;348:1472–7.

145 6). Jorgensen OD, Kronborg O, Fenger C. A randomised study of screening for colorectal  
146 cancer using faecal occult blood testing: results after 13 years and seven biennial  
147 screening rounds. *Gut* 2002;50:29–32.

148 7). Mandel JS, Church TR, Ederer F, et al. Colorectal cancer mortality: effectiveness of  
149 biennial screening for fecal occult blood. *J Natl Cancer Inst* 1999;91:434–7.

150 8). Hewitson P, Glasziou P, Irwig L, et al. Screening for colorectal cancer using the  
151 faecal occult blood test, Hemoccult. *Cochrane Database Syst Rev* 2007;24(1):CD001216.

152 9). Pignone M, Rich M, Teutsch SM, et al. Screening for colorectal cancer in adults at  
153 average risk: a summary of the evidence for the U.S. Preventive Services Task Force.  
154 *Ann Intern Med* 2002;137:132-41.

155 10). Levin B, Lieberman AD, McFarland B et al. Screening and surveillance for the  
156 early detection of colorectal cancer and adenomatous polyps, 2008: a joint guideline from

157 the American Cancer Society, the U.S. Multi-Society Task Force on Colorectal Cancer,  
158 and the American College of Radiology. *CA Cancer J Clin* 2008;58:130-60.

159 11). Sung JJ, Lau JY, Young GP, et al. Asia Pacific consensus recommendations for  
160 colorectal cancer screening. *Gut* 2008;57:1166-1176.

161 12). Recommendations on cancer screening in the European Union. Advisory Committee  
162 on Cancer Prevention. *Eur J Cancer*. 2000;36:1473–1478

163 13).U.S. Preventive Services Task Force. Screening for colorectal cancer: U.S.  
164 Preventive Services Task Force recommendation statement. *Ann Intern Med*  
165 2008;149:627–637.

166 14).Rex DK, Johnson DA, Anderson JC et al. American College of Gastroenterology  
167 Guidelines for Colorectal Cancer Screening 2008. *Am J Gastroenterol* 2009;104:739–750.

168 15). Wong MC, Ching JY, Lam TY et al. Prospective cohort study of compliance with  
169 faecal immunochemical tests for colorectal cancer screening in Hong Kong. *Prev Med*  
170 2013;57:227–231
